# Supplementary material
Source: Springer Nature journal article supplement (https://www.springermedizin.de/resource/supplementary/12943_2013_1490_MOESM6_ESM.pdf/9553180)

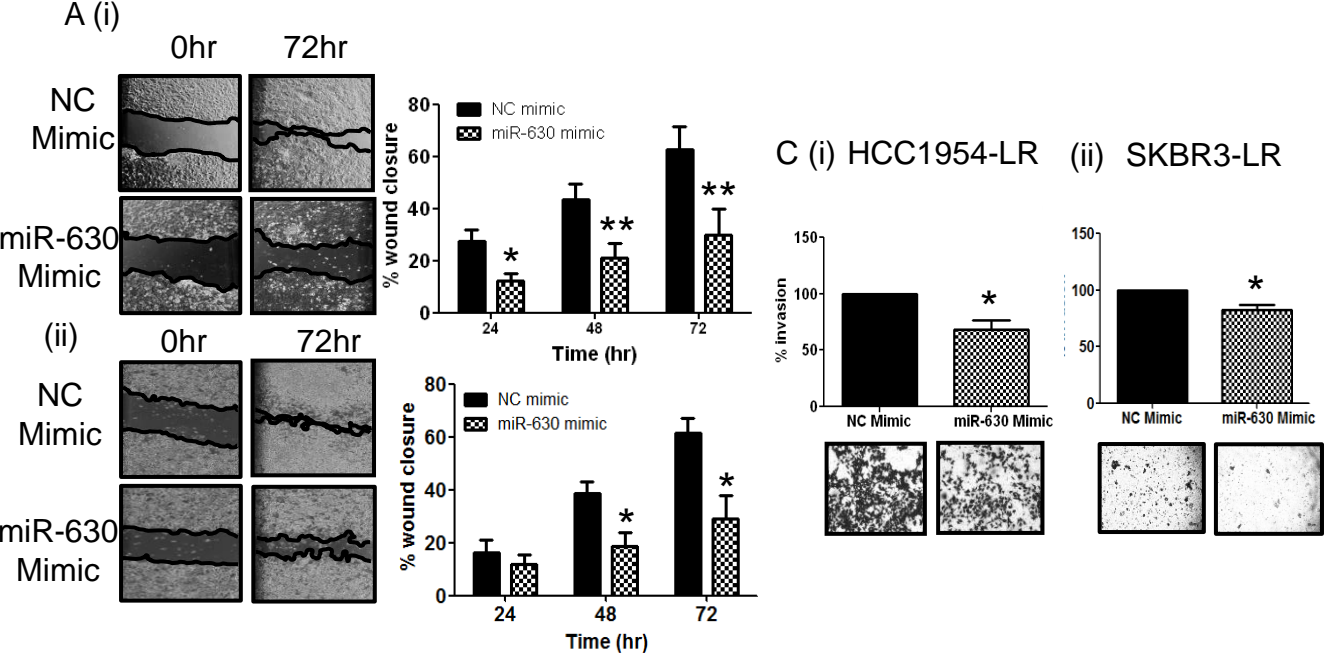

**B (i) HCC1954-LR**

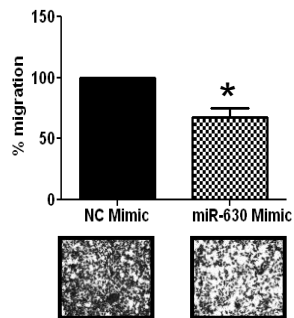

**(ii) SKBR3-LR**

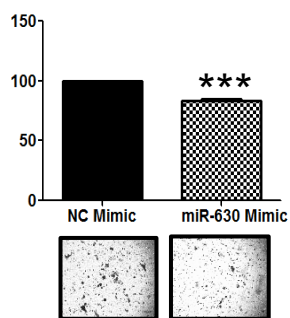

**D (i) HCC1954-LR**

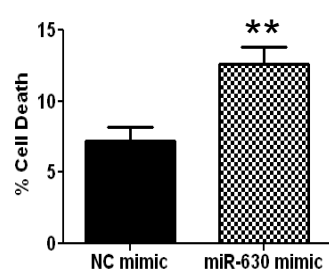

**(ii) SKBR3-LR**

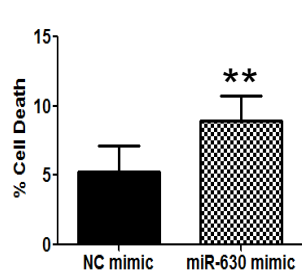

Supplement: MOESM6 [file 9553180]
